# Supplementary material
Source: Springer Nature journal article supplement (https://www.springermedizin.de/resource/supplementary/12885_2011_2958_MOESM2_ESM.pdf/9462364)
Supplement: MOESM2 [file 9462364]

## Key steps

## Clinicians

## Site coordinator

A. Patient identification and recruitment

**Site Surgeon**

Recruit and consent

Assist patients to  
Complete surveys

B. Clinical (pre-surgery) assessment

**FV Specialist**

Coordinate with Site  
Surgeon, FV Specialist  
and Site Pathologist

C. In OR, a step-by-step approach

**Site Surgeon**

**FV Specialist**

Coordinate with Site  
Surgeon, FV Specialist  
and Site Pathologist

D. Pathology Assessment (Tissue procurement)

**Site Pathologist**

Data and specimens  
collection

E. Follow-up

**Site Surgeon**

**FV Specialist**

Data and specimens  
collection
